# Supplementary material for: A Design-of-Experiments approach to developing thermoresponsive gelators from complex polymer mixtures
Source: Royal Society of Chemistry journal article supplement (doi:10.1039/d0me00093k), 2020-01-01
Supplement: d0me00093k1.pdf [file d0me00093k1.pdf]

A design-of-experiments approach to developing thermoresponsive gelators from complex polymer mixtures

Abou-Shamat, MA; Stair, JL; Kirton, SB; Calvo-Castro, J; Cook, MT

**Table S1.** The five TFs with the highest  $G'_{37^\circ\text{C}}$  predicted by the model

|            | Formulation Factors / % w/w |      |       |       |       |       |       |       |
|------------|-----------------------------|------|-------|-------|-------|-------|-------|-------|
|            | P407                        | P188 | L-PVA | H-PVA | L-PEG | H-PEG | L-PAA | H-PAA |
| <b>TF1</b> | 20.00                       | 0.10 | 0.03  | -     | -     | 0.04  | -     | 0.07  |
| <b>TF2</b> | 20.00                       | 0.09 | -     | -     | 0.03  | 0.03  | -     | 0.10  |
| <b>TF3</b> | 20.00                       | 0.10 | -     | 0.04  | -     | 0.06  | -     | 0.08  |
| <b>TF4</b> | 20.00                       | 0.05 | -     | -     | -     | 0.09  | 0.07  | 0.10  |
| <b>TF5</b> | 20.00                       | 0.10 | 0.03  | 0.01  | 0.01  | 0.07  | -     | 0.10  |

**Table S2.** The five extended test formulations with the highest predicted  $G'_{37^\circ\text{C}}$  and P407 maximum concentration of 25 % w/w

|             | Formulation Factors / % w/w |      |       |       |       |       |       |
|-------------|-----------------------------|------|-------|-------|-------|-------|-------|
|             | P407                        | P188 | H-PVA | L-PEG | H-PEG | L-PAA | H-PAA |
| <b>ETF1</b> | 21.56                       | 0.30 | 0.10  | 0.11  | 0.30  | 0.26  | 0.30  |
| <b>ETF2</b> | 21.89                       | 0.30 | 0.08  | -     | 0.26  | 0.19  | 0.15  |
| <b>ETF3</b> | 22.30                       | 0.28 | 0.29  | 0.03  | 0.30  | -     | 0.29  |
| <b>ETF4</b> | 23.30                       | 0.19 | 0.04  | -     | 0.27  | 0.04  | 0.30  |
| <b>ETF5</b> | 24.18                       | -    | 0.13  | 0.01  | 0.14  | 0.01  | 0.30  |

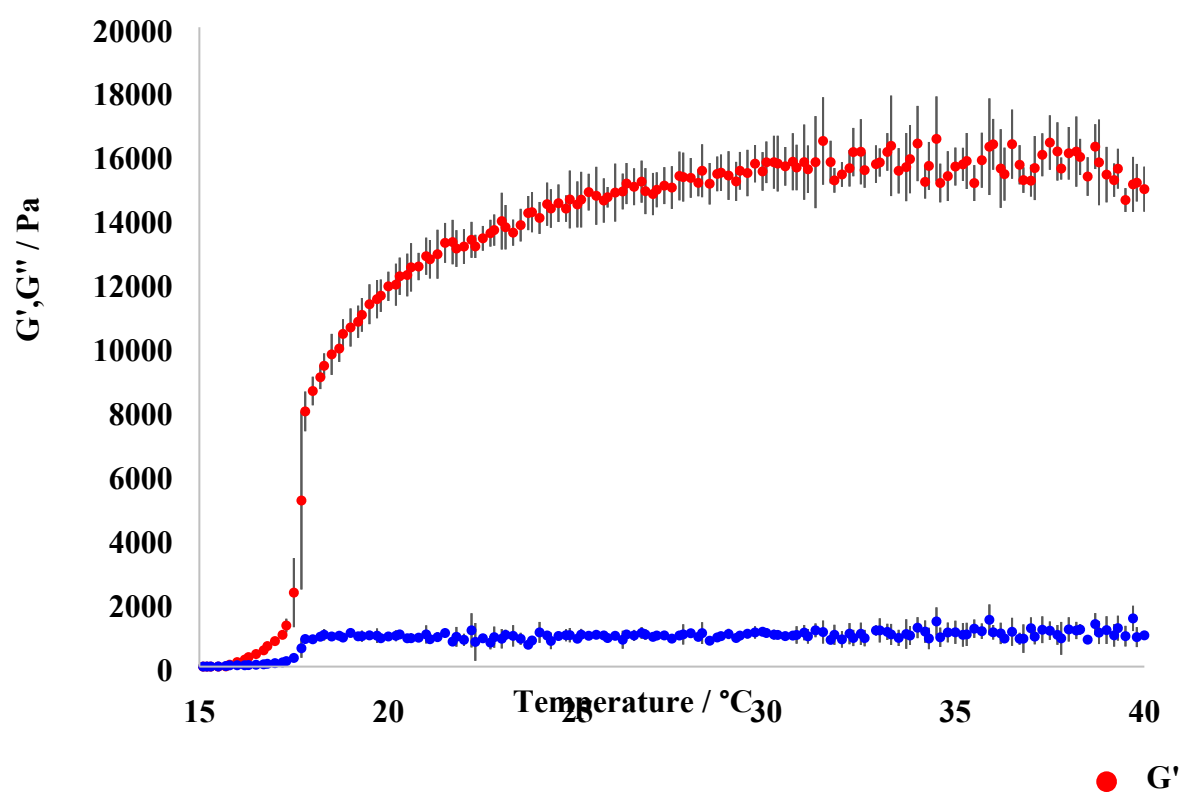

**Figure S1:** P407 20 % (w/w) Rheogram ( $n = 4, \pm \text{SD}$ ) where ( $G'$ ) is the storage modulus and ( $G''$ ) is the loss modulus.
